# Supplementary material for: Effects of Propranolol on Growth, Lipids and Energy Metabolism and Oxidative Stress Response of Phaeodactylum tricornutum
Source: PubMed Central journal article supplement (PMC7766914; doi:10.3390/biology9120478), 2020-12-18
Supplement: biology-09-00478-s001.pdf [file biology-09-00478-s001.pdf]

**Table S1.** Fatty acid and saturation classes relative concentrations in *Phaeodactylum tricornutum* cultures exposed to different propranolol concentrations (average  $\pm$  standard error, n = 3).

|             | 0 $\mu\text{g L}^{-1}$ | 0.3 $\mu\text{g L}^{-1}$ | 8 $\mu\text{g L}^{-1}$ | 80 $\mu\text{g L}^{-1}$ | 150 $\mu\text{g L}^{-1}$ | 300 $\mu\text{g L}^{-1}$ |
|-------------|------------------------|--------------------------|------------------------|-------------------------|--------------------------|--------------------------|
| 14:0        | 7.76 $\pm$ 0.40        | 11.01 $\pm$ 0.66         | 9.59 $\pm$ 0.84        | 8.45 $\pm$ 0.23         | 8.50 $\pm$ 1.55          | 7.85 $\pm$ 0.71          |
| 16:0        | 28.52 $\pm$ 0.36       | 30.94 $\pm$ 3.38         | 32.44 $\pm$ 2.72       | 22.28 $\pm$ 1.84        | 18.34 $\pm$ 3.15         | 24.55 $\pm$ 3.35         |
| 16:1 n-7    | 34.82 $\pm$ 1.20       | 30.91 $\pm$ 1.33         | 36.34 $\pm$ 0.46       | 28.10 $\pm$ 0.46        | 20.96 $\pm$ 1.33         | 31.55 $\pm$ 3.46         |
| 16:2 n-7    | 2.96 $\pm$ 0.46        | 4.16 $\pm$ 0.64          | 2.43 $\pm$ 0.08        | 4.32 $\pm$ 0.30         | 7.13 $\pm$ 0.05          | 4.25 $\pm$ 0.58          |
| 16:3 n-4    | 5.04 $\pm$ 0.23        | 6.089 $\pm$ 1.59         | 4.36 $\pm$ 0.13        | 7.82 $\pm$ 0.30         | 11.49 $\pm$ 2.02         | 7.33 $\pm$ 0.64          |
| 16:4 n-1    | 2.94 $\pm$ 0.42        | 2.73 $\pm$ 0.49          | 1.95 $\pm$ 0.24        | 2.63 $\pm$ 0.10         | 2.96 $\pm$ 0.70          | 2.56 $\pm$ 1.34          |
| 18:3 n-6    | 0.92 $\pm$ 0.25        | 0.69 $\pm$ 0.24          | 0.23 $\pm$ 0.18        | 0.74 $\pm$ 0.43         | 3.16 $\pm$ 2.29          | 0.68 $\pm$ 0.21          |
| 18:4 n-3    | 2.55 $\pm$ 0.41        | 1.76 $\pm$ 0.33          | 1.51 $\pm$ 0.40        | 2.55 $\pm$ 0.50         | 1.24 $\pm$ 0.62          | 1.15 $\pm$ 0.22          |
| 20:4 n-6    | 0.14 $\pm$ 0.12        | 1.50 $\pm$ 0.52          | 0.40 $\pm$ 0.26        | 0.00 $\pm$ 0.00         | 0.48 $\pm$ 0.36          | 0.02 $\pm$ 0.03          |
| 20:5 n-3    | 14.36 $\pm$ 0.80       | 10.21 $\pm$ 1.93         | 10.75 $\pm$ 2.58       | 23.11 $\pm$ 2.29        | 25.74 $\pm$ 4.54         | 20.07 $\pm$ 5.20         |
| SFA         | 36.27 $\pm$ 0.06       | 41.95 $\pm$ 2.33         | 42.02 $\pm$ 1.68       | 30.73 $\pm$ 1.14        | 26.84 $\pm$ 2.71         | 32.39 $\pm$ 2.33         |
| MUFA        | 34.82 $\pm$ 0.69       | 30.91 $\pm$ 0.77         | 36.34 $\pm$ 0.27       | 28.10 $\pm$ 0.27        | 20.96 $\pm$ 0.77         | 31.55 $\pm$ 2.00         |
| PUFA        | 28.90 $\pm$ 0.64       | 27.14 $\pm$ 3.09         | 21.64 $\pm$ 1.73       | 41.17 $\pm$ 0.89        | 52.20 $\pm$ 3.43         | 36.06 $\pm$ 4.33         |
| LC-<br>PUFA | 14.50 $\pm$ 0.39       | 11.71 $\pm$ 1.28         | 11.15 $\pm$ 1.47       | 23.11 $\pm$ 1.32        | 26.22 $\pm$ 2.81         | 20.08 $\pm$ 2.99         |
| UFA         | 63.73 $\pm$ 0.06       | 58.05 $\pm$ 2.33         | 57.98 $\pm$ 1.68       | 69.27 $\pm$ 1.14        | 73.16 $\pm$ 2.71         | 67.61 $\pm$ 2.33         |

**Publisher's Note:** MDPI stays neutral with regard to jurisdictional claims in published maps and institutional affiliations.

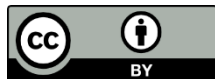

© 2020 by the authors. Licensee MDPI, Basel, Switzerland. This article is an open access article distributed under the terms and conditions of the Creative Commons Attribution (CC BY) license (<http://creativecommons.org/licenses/by/4.0/>).
